# Supplementary material for: Comparison of early warning scores in patients with COPD exacerbation: DECAF and NEWS score
Source: PubMed Central journal article supplement — Thorax. 2019 Aug 6;74(10):941–6. doi: 10.1136/thoraxjnl-2019-213470 (PMC6817986; doi:10.1136/thoraxjnl-2019-213470), 2019-08-06
Supplement: thoraxjnl-2019-213470supp001.pdf [file thoraxjnl-2019-213470supp001.pdf]

## Online supplement

Supplementary table 1. Area under the receiver operator curve and 95% confidence interval for DECAF, NEWS2<sub>All COPD</sub>, NEWS2 and NEWS in predicting inpatient mortality in patients with COPD exacerbation

| Cohort       | DECAF             | NEWS2 <sub>All COPD</sub> | NEWS2             | NEWS              | DECAF v NEWS2 <sub>All COPD</sub> , p | NEWS2 <sub>All COPD</sub> v NEWS2, p | NEWS2 <sub>All COPD</sub> v NEWS, p | NEWS2 v NEWS, p |
|--------------|-------------------|---------------------------|-------------------|-------------------|---------------------------------------|--------------------------------------|-------------------------------------|-----------------|
| All patients | 0.83<br>0.81-0.86 | 0.72<br>0.68-0.76         | 0.70<br>0.67-0.74 | 0.65<br>0.61-0.68 | <0.001                                | 0.090                                | <0.001                              | <0.001          |
| Derivation   | 0.86<br>0.82-0.89 | 0.69<br>0.64-0.76         | 0.69<br>0.63-0.75 | 0.62<br>0.57-0.68 | <0.001                                | 0.619                                | <0.001                              | 0.002           |
| Validation   | 0.82<br>0.79-0.85 | 0.73<br>0.69-0.73         | 0.71<br>0.66-0.76 | 0.66<br>0.61-0.71 | <0.001                                | 0.091                                | <0.001                              | <0.001          |

\*P value calculated by method of DeLong
